# Supplementary material for: Nomogram based on homogeneous and heterogeneous associated factors for predicting bone metastases in patients with different histological types of lung cancer
Source: PubMed Central journal article supplement (PMC6420732; doi:10.1186/s12885-019-5445-3), 2019-03-15
Supplement: 12885_2019_5445_MOESM2_ESM.pdf [file 12885_2019_5445_MOESM2_ESM.pdf]

**Table S2: Univariate logistic regression for the presence of bone metastases at diagnosis of different subtypes of lung cancer.**

| Variable                  | Patients, No.                |                           | Entire cohort   |         |                 |         |                 |         |                 |         |                 |         |
|---------------------------|------------------------------|---------------------------|-----------------|---------|-----------------|---------|-----------------|---------|-----------------|---------|-----------------|---------|
|                           | No Bone metastasis<br>No (%) | Bone metastasis<br>No (%) | Adenocarcinoma  |         | Squamous        |         | SCLC            |         | LC              |         | NOS/NSCLC       |         |
|                           |                              |                           | OR (95% CI)     | P-value | OR (95% CI)     | P-value | OR (95% CI)     | P-value | OR (95% CI)     | P-value | OR (95% CI)     | P-value |
| <b>Age (years)</b>        |                              |                           |                 |         |                 |         |                 |         |                 |         |                 |         |
| 18-45                     | 2407(75.7)                   | 774(24.3)                 | ref             | 1.0     | ref             | 1.0     | ref             | 1.0     | ref             | 1.0     | ref             | 1.0     |
| 46-65                     | 43585(77.2)                  | 12903(22.8)               | 0.77(0.69-0.86) | <0.001  | 0.63(0.47-0.84) | 0.001   | 1.31(0.98-1.76) | 0.07    | 0.89(0.49-1.61) | 0.69    | 1.69(1.39-2.05) | <0.001  |
| 66-79                     | 51254(81.1)                  | 11968(18.9)               | 0.61(0.55-0.68) | <0.001  | 0.50(0.38-0.66) | <0.001  | 1.20(0.90-1.61) | 0.22    | 0.74(0.41-1.35) | 0.33    | 1.39(1.15-1.70) | 0.001   |
| <b>Sex</b>                |                              |                           |                 |         |                 |         |                 |         |                 |         |                 |         |
| Female                    | 46496(81.2)                  | 10752(18.8)               | ref             | 1.0     | ref             | 1.0     | ref             | 1.0     | ref             | 1.0     | ref             | 1.0     |
| Male                      | 50750(77.3)                  | 14893(22.7)               | 1.30(1.25-1.35) | <0.001  | 1.33(1.23-1.44) | <0.001  | 1.41(1.31-1.50) | <0.001  | 1.51(1.21-1.87) | <0.001  | 1.57(1.46-1.68) | <0.001  |
| <b>Race</b>               |                              |                           |                 |         |                 |         |                 |         |                 |         |                 |         |
| White                     | 77539(79.3)                  | 20286(20.7)               | ref             | 1.0     | ref             | 1.0     | ref             | 1.0     | ref             | 1.0     | ref             | 1.0     |
| Black                     | 12781(80.1)                  | 3171(19.9)                | 0.92(0.87-0.98) | 0.005   | 1.20(1.08-1.33) | 0.001   | 0.73(0.64-0.82) | <0.001  | 1.00(0.74-1.35) | 0.10    | 1.01(0.92-1.12) | 0.83    |
| Asian or Pacific Islander | 6136(75.4)                   | 2001(24.6)                | 1.23(1.15-1.31) | <0.001  | 1.25(1.06-1.48) | 0.008   | 0.73(0.60-0.90) | 0.003   | 1.70(1.04-2.80) | 0.036   | 1.17(1.02-1.34) | 0.02    |
| Indian/Alaska Native      | 523(80.6)                    | 126(19.4)                 | 1.31(0.99-1.74) | 0.057   | 0.67(0.39-1.15) | 0.15    | 0.61(0.38-0.98) | 0.04    | 1.81(0.47-7.03) | 0.39    | 0.80(0.48-1.35) | 0.40    |
| <b>Marital status</b>     |                              |                           |                 |         |                 |         |                 |         |                 |         |                 |         |
| Unmarried                 | 15883(78.4)                  | 4386(21.6)                | ref             | 1.0     | ref             | 1.0     | ref             | 1.0     | ref             | 1.0     | ref             | 1.0     |

|                         |             |             |                    |        |                    |        |                  |        |                   |        |                   |        |
|-------------------------|-------------|-------------|--------------------|--------|--------------------|--------|------------------|--------|-------------------|--------|-------------------|--------|
| Married                 | 76869(79.2) | 20146(20.8) | 0.97(0.92-1.03)    | 0.32   | 0.81(0.74-0.89)    | <0.001 | 1.07(0.97-1.17)  | 0.19   | 0.93(0.71-1.21)   | 0.57   | 0.91(0.84-0.99)   | 0.04   |
| <b>Household income</b> |             |             |                    |        |                    |        |                  |        |                   |        |                   |        |
| < 50000\$               | 33657(80.1) | 8372(19.9)  | ref                | 1.0    | ref                | 1.0    | ref              | 1.0    | ref               | 1.0    | ref               | 1.0    |
| 50000-80000\$           | 56393(78.7) | 15256(21.3) | 1.09(1.04-1.13)    | <0.001 | 1.08(1.00-1.16)    | 0.05   | 1.04(0.97-1.11)  | 0.32   | 1.04(0.84-1.29)   | 0.71   | 0.98(0.91-1.05)   | 0.52   |
| > 80000\$               | 7190(78.1)  | 2017(21.9)  | 1.15(1.07-1.24)    | <0.001 | 1.12(0.96-1.31)    | 0.16   | 0.98(0.84-1.14)  | 0.79   | 0.65(0.38-1.09)   | 0.10   | 0.92(0.80-1.06)   | 0.25   |
| <b>Insurance status</b> |             |             |                    |        |                    |        |                  |        |                   |        |                   |        |
| Uninsured               | 3751(75.2)  | 1234(24.8)  | ref                | 1.0    | ref                | 1.0    | ref              | 1.0    | ref               | 1.0    | ref               | 1.0    |
| Insured                 | 92084(79.3) | 24031(20.7) | 0.80(0.73-0.88)    | <0.001 | 0.65(0.54-0.77)    | <0.001 | 1.09(0.92-1.28)  | 0.34   | 0.65(0.42-1.01)   | 0.051  | 0.76(0.65-0.89)   | 0.001  |
| <b>Metastatic sites</b> |             |             |                    |        |                    |        |                  |        |                   |        |                   |        |
| 0 site                  | 71363(87.5) | 10192(12.5) | ref                | 1.0    | ref                | 1.0    | ref              | 1.0    | ref               | 1.0    | ref               | 1.0    |
| 1 site                  | 21085(67.7) | 10071(32.3) | 3.02(2.89-3.16)    | <0.001 | 4.05(3.73-4.40)    | <0.001 | 2.76(2.56-2.99)  | <0.001 | 3.53(2.78-4.50)   | <0.001 | 3.52(3.26-3.81)   | <0.001 |
| 2 sites                 | 4339(50.0)  | 4331(50.0)  | 6.50(6.07-6.95)    | <0.001 | 9.39(8.15-10.82)   | <0.001 | 5.07(4.56-5.64)  | <0.001 | 7.44(5.34-10.37)  | <0.001 | 7.00(6.25-7.85)   | <0.001 |
| 3 sites                 | 439(33.6)   | 868(66.4)   | 14.87(12.47-17.71) | <0.001 | 17.71(12.49-25.13) | <0.001 | 8.34(6.47-10.76) | <0.001 | 11.50(4.55-29.03) | <0.001 | 12.57(9.66-16.34) | <0.001 |
| <b>Tumor size</b>       |             |             |                    |        |                    |        |                  |        |                   |        |                   |        |
| <2 cm                   | 14785(88.1) | 1996(11.9)  | ref                | 1.0    | ref                | 1.0    | ref              | 1.0    | ref               | 1.0    | ref               | 1.0    |
| 2-5 cm                  | 41463(80.4) | 10122(19.6) | 1.92(1.79-2.06)    | <0.001 | 1.73(1.45-2.05)    | <0.001 | 1.52(1.32-1.76)  | <0.001 | 1.54(1.02-2.33)   | 0.04   | 2.14(1.89-2.41)   | <0.001 |
| 5-10 cm                 | 23894(77.7) | 6859(22.3)  | 2.48(2.31-2.67)    | <0.001 | 2.40(2.02-2.85)    | <0.001 | 1.62(1.40-1.86)  | <0.001 | 2.28(1.50-3.46)   | <0.001 | 2.67(2.35-3.03)   | <0.001 |

|                             |             |             |                 |        |                 |        |                 |        |                 |        |                   |        |
|-----------------------------|-------------|-------------|-----------------|--------|-----------------|--------|-----------------|--------|-----------------|--------|-------------------|--------|
| >10 cm                      | 3210(78.6)  | 875(21.4)   | 1.93(1.66-2.24) | <0.001 | 2.67(2.12-3.38) | <0.001 | 1.63(1.34-1.97) | <0.001 | 2.09(1.18-3.69) | 0.01   | 2.67(2.17-3.28)   | <0.001 |
| <b>Histological type</b>    |             |             |                 |        |                 |        |                 |        |                 |        |                   |        |
| Well differentiated         | 6441(94.5)  | 372(5.5)    | ref             | 1.0    | ref             | 1.0    | ref             | 1.0    | ref             | 1.0    | ref               | 1.0    |
| Moderate differentiated     | 18285(89.5) | 2149(10.5)  | 2.12(1.86-2.43) | <0.001 | 0.87(0.63-1.22) | 0.43   | 0.90(0.28-2.89) | 0.86   | -               | 1.0    | 2.94(2.09-4.13)   | <0.001 |
| Poor differentiated         | 26632(82.4) | 5681(17.6)  | 3.31(2.92-3.77) | <0.001 | 1.58(1.13-2.19) | 0.007  | 1.02(0.41-2.55) | 0.96   | -               | 1.0    | 11.72(8.75-15.70) | <0.001 |
| Undifferentiated            | 3315(78.5)  | 909(21.5)   | 3.98(2.95-5.37) | <0.001 | 1.89(1.09-3.28) | 0.024  | 1.03(0.42-2.57) | 0.94   | -               | 1.0    | 11.62(8.20-16.47) | <0.001 |
| <b>Lymphatic metastasis</b> |             |             |                 |        |                 |        |                 |        |                 |        |                   |        |
| N0                          | 38449(89.9) | 4325(10.1)  | ref             | 1.0    | ref             | 1.0    | ref             | 1.0    | ref             | 1.0    | ref               | 1.0    |
| N1                          | 8708(81.4)  | 1985(18.6)  | 1.96(1.80-2.12) | <0.001 | 1.96(1.70-2.26) | <0.001 | 1.49(1.25-1.78) | <0.001 | 2.85(1.84-4.39) | <0.001 | 2.75(2.41-3.15)   | <0.001 |
| N2                          | 35358(74.2) | 12297(25.8) | 3.25(3.09-3.42) | <0.001 | 3.02(2.75-3.33) | <0.001 | 1.95(1.73-2.20) | <0.001 | 3.94(2.90-5.34) | <0.001 | 3.56(3.26-3.90)   | <0.001 |
| N3                          | 12635(69.0) | 5682(31.0)  | 3.95(3.71-4.20) | <0.001 | 3.87(3.44-4.36) | <0.001 | 2.73(2.40-3.11) | <0.001 | 4.96(3.49-7.06) | <0.001 | 4.28(3.83-4.77)   | <0.001 |

SCLC=small cell lung cancer; LC=large cell; NOS =not otherwise specified; NSCLC=non-small cell lung cancer.
