# Supplementary material for: Nomogram based on homogeneous and heterogeneous associated factors for predicting bone metastases in patients with different histological types of lung cancer
Source: Springer Nature journal article supplement (doi:10.1186/s12885-019-5445-3), 2019-03-15
Supplement: MOESM1 [file 16552296]

**Table S1: Difference in the prevalence of bone metastasis in different histological subtypes of lung cancer.**

|                       | <b>Adenocarcinoma</b>          | <b>Squamous</b>                | <b>SCLC</b>                    | <b>LC</b>                    | <b>NOS/NSCLC</b>              |
|-----------------------|--------------------------------|--------------------------------|--------------------------------|------------------------------|-------------------------------|
| <b>Adenocarcinoma</b> | 1.00                           | $\chi^2=1552.93$<br>$P<0.0001$ | $\chi^2=0.72$<br>$P=0.396$     | $\chi^2=17.75$<br>$P<0.0001$ | $\chi^2=217.86$<br>$P<0.0001$ |
| <b>Squamous</b>       | $\chi^2=1552.93$<br>$P<0.0001$ | 1.00                           | $\chi^2=1120.77$<br>$P<0.0001$ | $\chi^2=89.79$<br>$P<0.0001$ | $\chi^2=429.54$<br>$P<0.0001$ |
| <b>SCLC</b>           | $\chi^2=0.72$<br>$P=0.396$     | $\chi^2=1120.77$<br>$P<0.0001$ | 1.00                           | $\chi^2=29.22$<br>$P<0.0001$ | $\chi^2=163.85$<br>$P<0.0001$ |
| <b>LC</b>             | $\chi^2=17.75$<br>$P<0.0001$   | $\chi^2=89.79$<br>$P<0.0001$   | $\chi^2=29.22$<br>$P<0.0001$   | 1.00                         | $\chi^2=0.027$<br>$P=0.87$    |
| <b>NOS/NSCLC</b>      | $\chi^2=217.86$<br>$P<0.0001$  | $\chi^2=429.54$<br>$P<0.0001$  | $\chi^2=163.85$<br>$P<0.0001$  | $\chi^2=0.027$<br>$P=0.87$   | 1.00                          |

SCLC=small cell lung cancer; LC=large cell; NOS =not otherwise specified; NSCLC=non-small cell lung cancer.
