# Supplementary material for: Nomogram based on homogeneous and heterogeneous associated factors for predicting bone metastases in patients with different histological types of lung cancer
Source: Springer Nature journal article supplement (doi:10.1186/s12885-019-5445-3), 2019-03-15
Supplement: MOESM3 [file 16552296]

**Table S3: Multivariable logistic regression for the presence of bone metastases at diagnosis of lung cancer.**

| Variable                  | No Bone metastasis<br>No (%) | Bone metastasis<br>No (%) | OR (95% CI)     | P-value |
|---------------------------|------------------------------|---------------------------|-----------------|---------|
| <b>Age (years)</b>        |                              |                           |                 |         |
| 18-45                     | 2407(75.7)                   | 774(24.3)                 | ref             | 1.0     |
| 46-65                     | 43585(77.2)                  | 12903(22.8)               | 0.92(0.85-1.00) | 0.05    |
| 66-79                     | 51254(81.1)                  | 11968(18.9)               | 0.73(0.67-0.79) | 0.73    |
| <b>Sex</b>                |                              |                           |                 |         |
| Female                    | 46496(81.2)                  | 10752(18.8)               | ref             | 1.0     |
| Male                      | 50750(77.3)                  | 14893(22.7)               | 1.27(1.23-1.31) | <0.001  |
| <b>Race</b>               |                              |                           |                 |         |
| White                     | 77539(79.3)                  | 20286(20.7)               | ref             | 1.0     |
| Black                     | 12781(80.1)                  | 3171(19.9)                | 0.95(0.91-0.99) | 0.013   |
| Asian or Pacific Islander | 6136(75.4)                   | 2001(24.6)                | 1.25(1.18-1.31) | <0.001  |
| Indian/Alaska Native      | 523(80.6)                    | 126(19.4)                 | 0.92(0.76-1.12) | 0.41    |
| <b>Marital status</b>     |                              |                           |                 |         |
| Unmarried                 | 15883(78.4)                  | 4386(21.6)                | ref             | 1.0     |
| Married                   | 76869(79.2)                  | 20146(20.8)               | 0.95(0.92-0.99) | 0.005   |
| <b>Household income</b>   |                              |                           |                 |         |
| < 50000\$                 | 33657(80.1)                  | 8372(19.9)                | ref             | 1.0     |
| 50000-80000\$             | 56393(78.7)                  | 15256(21.3)               | 1.09(1.06-1.12) | <0.001  |
| > 80000\$                 | 7190(78.1)                   | 2017(21.9)                | 1.13(1.07-1.19) | <0.001  |
| <b>Insurance status</b>   |                              |                           |                 |         |
| Uninsured                 | 3751(75.2)                   | 1234(24.8)                | ref             | 1.0     |

|                             |             |             |                    |        |
|-----------------------------|-------------|-------------|--------------------|--------|
| Insured                     | 92084(79.3) | 24031(20.7) | 0.79(0.74-0.85)    | <0.001 |
| <b>Metastatic sites</b>     |             |             |                    |        |
| 0 site                      | 71363(87.5) | 10192(12.5) | ref                | 1.0    |
| 1 site                      | 21085(67.7) | 10071(32.3) | 3.34(3.24-3.45)    | <0.001 |
| 2 sites                     | 4339(50.0)  | 4331(50.0)  | 6.99(6.67-7.33)    | <0.001 |
| 3 sites                     | 439(33.6)   | 868(66.4)   | 13.84(12.32-15.56) | <0.001 |
| <b>Tumor size</b>           |             |             |                    |        |
| <2 cm                       | 14785(88.1) | 1996(11.9)  | ref                | 1.0    |
| 2-5 cm                      | 41463(80.4) | 10122(19.6) | 1.81(1.72-1.90)    | <0.001 |
| 5-10 cm                     | 23894(77.7) | 6859(22.3)  | 2.13(2.02-2.24)    | <0.001 |
| >10 cm                      | 3210(78.6)  | 875(21.4)   | 2.02(1.85-2.21)    | <0.001 |
| <b>Histological type</b>    |             |             |                    |        |
| Well differentiated         | 6441(94.5)  | 372(5.5)    | ref                | 1.0    |
| Moderate differentiated     | 18285(89.5) | 2149(10.5)  | 2.04(1.82-2.28)    | <0.001 |
| Poor differentiated         | 26632(82.4) | 5681(17.6)  | 3.69(3.31-4.12)    | <0.001 |
| Undifferentiated            | 3315(78.5)  | 909(21.5)   | 4.75(4.18-5.39)    | <0.001 |
| <b>Lymphatic metastasis</b> |             |             |                    |        |
| N0                          | 38449(89.9) | 4325(10.1)  | ref                | 1.0    |
| N1                          | 8708(81.4)  | 1985(18.6)  | 2.03(1.91-2.15)    | <0.001 |
| N2                          | 35358(74.2) | 12297(25.8) | 3.09(2.98-3.21)    | <0.001 |
| N3                          | 12635(69.0) | 5682(31.0)  | 4.00(3.82-4.18)    | <0.001 |

Abbreviations: SCLC=small cell lung cancer; LC=large cell; NOS =not otherwise specified; NSCLC=non-small cell lung cancer.
